# Supplementary material for: Cilia-Associated Genes Play Differing Roles in Aminoglycoside-Induced Hair Cell Death in Zebrafish
Source: PubMed Central journal article supplement (PMC4938675; doi:10.1534/g3.116.030080), 2016-05-19
Supplement: supp_g3.116.030080_TableS1.pdf [file supp_g3.116.030080_TableS1.pdf]

**Table S1 Strains used in this study**

| Gene            | Allele         | Nucleotide Change                              | Protein Change                                  | How Generated      | Reference                                                 |
|-----------------|----------------|------------------------------------------------|-------------------------------------------------|--------------------|-----------------------------------------------------------|
| <i>arl13b</i>   | <i>hi459Tg</i> | Proviral insertion in 5'-UTR                   | No protein product made                         | Proviral insertion | (Golling <i>et al.</i> 2002; Duldulao <i>et al.</i> 2009) |
| <i>cc2d2a</i>   | <i>w38</i>     | g1884a                                         | W628X                                           | ENU                | (Owens <i>et al.</i> 2008)                                |
| <i>cc2d2a</i>   | <i>w123</i>    | t to g in 2 <sup>nd</sup> residue of intron 20 | Frame shift after R876 caused by splicing error | ENU                |                                                           |
| <i>cep290</i>   | <i>fh378</i>   | Deletion of c294 & c295                        | Frame shift after A99                           | TALEN              |                                                           |
| <i>dync2h1</i>  | <i>w46</i>     | g1452a                                         | W484Stop                                        | ENU                |                                                           |
| <i>ift88</i>    | <i>tz288</i>   | t779a                                          | L260Stop                                        | ENU                | (Brand <i>et al.</i> 1996; Tsujikawa and Malicki 2004)    |
| <i>mks1</i>     | <i>w152</i>    | 25 bp insertion after a181                     | Frame shift after S61                           | CRISPR             |                                                           |
| <i>traf3ip1</i> | <i>tp49d</i>   | c583t                                          | R195Stop                                        | ENU                | (Brand <i>et al.</i> 1996; Omori <i>et al.</i> 2008)      |
| <i>wdr35</i>    | <i>w150</i>    | t2426a                                         | L809Stop                                        | ENU                |                                                           |

Brand M., Heisenberg C. P., Warga R. M., Pelegri F., Karlstrom R. O., Beuchle D., Picker A., Jiang Y. J., Furutani-Seiki M., Eeden F. J. van, Granato M., Haffter P., Hammerschmidt M., Kane D. A., Kelsh R. N., Mullins M. C., Odenthal J., Nusslein-Volhard C., 1996 Mutations affecting development of the midline and general body shape during zebrafish embryogenesis. *Development* **123**: 129–142.

Duldulao N. A., Lee S., Sun Z., 2009 Cilia localization is essential for in vivo functions of the Joubert syndrome protein Arl13b/Scorpion. *Development* **136**: 4033–42.

Golling G., Amsterdam A., Sun Z., Antonelli M., Maldonado E., Chen W., Burgess S., Haldi M., Artzt K., Farrington S., Lin S.-Y., Nissen R. M., Hopkins N., 2002 Insertional mutagenesis in zebrafish rapidly identifies genes essential for early vertebrate development. *Nat. Genet.* **31**: 135–40.

Omori Y., Zhao C., Saras A., Mukhopadhyay S., Kim W., Furukawa T., Sengupta P., Veraksa A., Malicki J., 2008 Elipsa is an early determinant of ciliogenesis that links the IFT particle to membrane-associated small GTPase Rab8. *Nat. Cell Biol.* **10**: 437–44.

Owens K. N., Santos F., Roberts B., Linbo T., Coffin A. B., Knisely A. J., Simon J. A., Rubel E. W., Raible D. W., 2008 Identification of genetic and chemical modulators of zebrafish mechanosensory hair cell death. *PLoS Genet.* **4**: e1000020.

Tsujikawa M., Malicki J., 2004 Intraflagellar transport genes are essential for differentiation and

survival of vertebrate sensory neurons. *Neuron* **42**: 703–16.
